# Supplementary material for: iADRGSE: A Graph-Embedding and Self-Attention Encoding for Identifying Adverse Drug Reaction in the Earlier Phase of Drug Development
Source: MDPI journal article supplement (doi:10.3390/ijms232416216), 2022-12-19
Supplement: s1 [file s1]

**Table S1.** The specific hyper-parameter settings on baseline methods

| Baseline     | Dropout | Learning_rate | Batch_size | optimizer | Activation |
|--------------|---------|---------------|------------|-----------|------------|
| CNN_FP2      | 0.4     | 1e-3          | 64         | Adam      | RELU       |
| BERT_smiles  | 0.4     | 1e-4          | 64         | Adam      | RELU       |
| Attentive_FP | 0.4     | 1e-3          | 64         | Adam      | RELU       |
